# Supplementary material
Source: Springer Nature journal article supplement (https://www.springermedizin.de/resource/supplementary/13075_2010_2902_MOESM7_ESM.pdf/9693146)

(A)

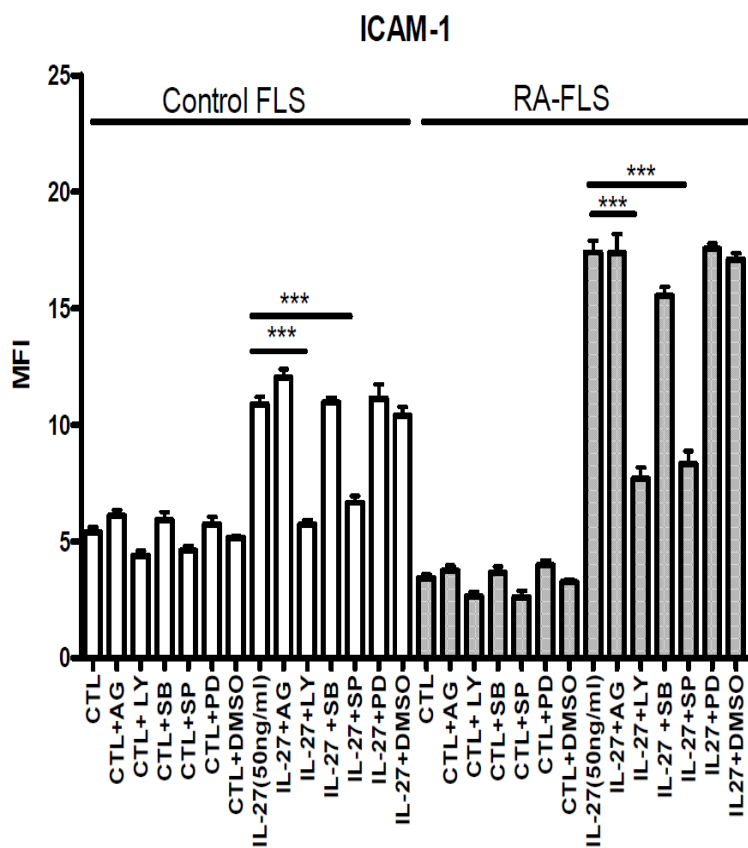

(B)

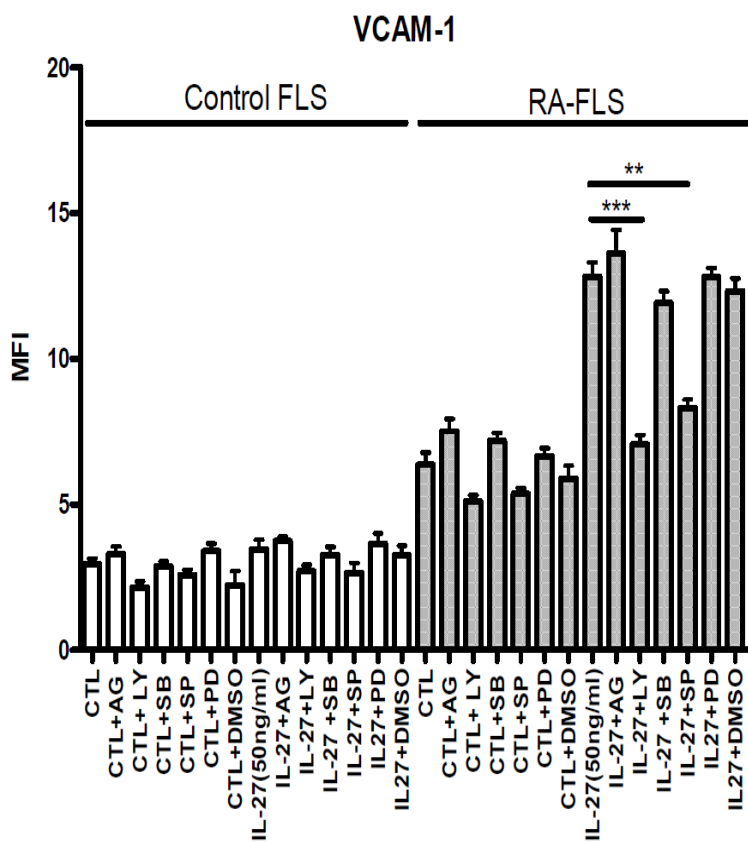

(C)

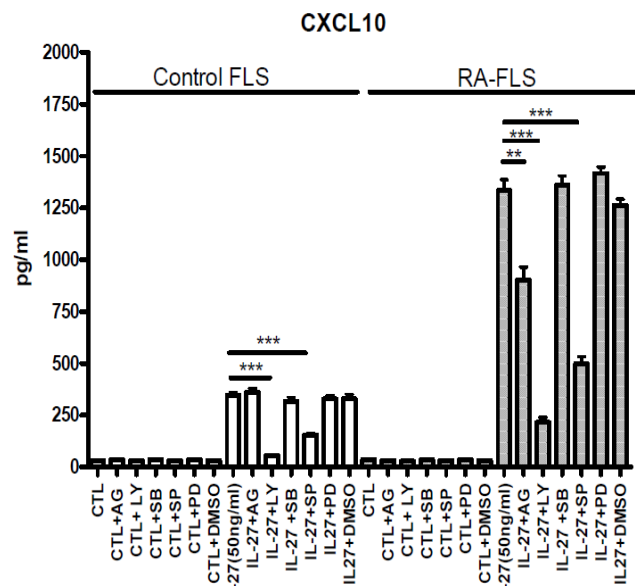

(D)

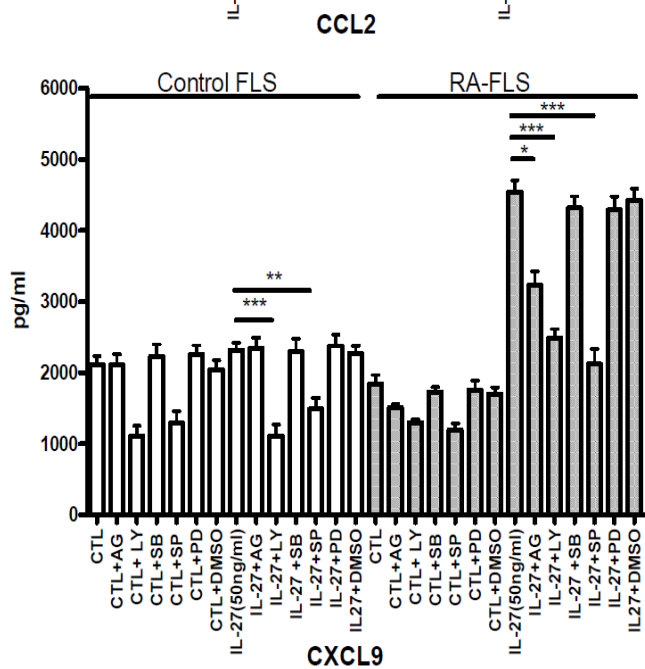

(E)

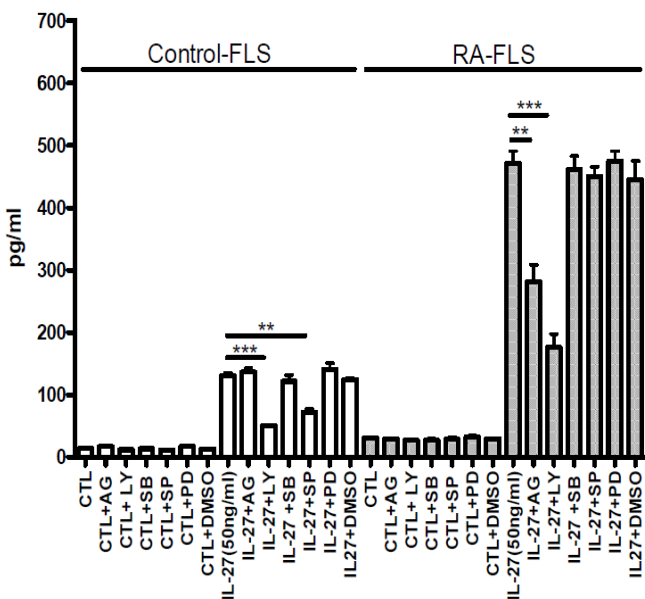

Supplement: MOESM7 [file 9693146]
